# Supplementary material for: Safety, Feasibility and Technical Considerations from a Prospective, Observational Study—CIREL: Irinotecan-TACE for CRLM in 152 Patients
Source: MDPI journal article supplement (doi:10.3390/jcm11206178), 2022-10-19
Supplement: s1 [file s1]

**Supplementary Table S1.**

|                      | LLN | ULN | UNIT            | G1             | G2                          | G3                        | G4                          | UNIT            |
|----------------------|-----|-----|-----------------|----------------|-----------------------------|---------------------------|-----------------------------|-----------------|
| Lymphocytes          | 1.2 |     | $\times 10^9/L$ | < LLN          | < 0.8                       | < 0.5                     | < 0.2                       | $\times 10^9/L$ |
| Platelets            | 150 |     | $\times 10^9/L$ | < 150          | < 75                        | < 50                      | < 25                        | $\times 10^9/L$ |
| Neutrophils          | 2   |     | $\times 10^9/L$ | < 2            | < 1.5                       | < 1                       | < 0.5                       | $\times 10^9/L$ |
| Alkaline phosphatase |     | 120 | U/L             | > ULN<br>> 120 | > ULN $\times$ 2.5<br>> 300 | > ULN $\times$ 5<br>> 600 | > ULN $\times$ 20<br>> 2400 | U/L             |
| Albumin              | 3.5 |     | g/dL            | < 3.5          | < 3                         | < 2                       |                             | g/dL            |
| AST /SGOT            |     | 40  | U/L             | > ULN<br>40    | > ULN $\times$ 3<br>120     | > ULN $\times$ 5<br>200   | > ULN $\times$ 20<br>800    | U/L             |
| ALT /SGPT            |     | 40  | U/L             | > ULN<br>40    | > ULN $\times$ 3<br>120     | > ULN $\times$ 5<br>200   | > ULN $\times$ 20<br>800    | U/L             |
| Blood Bilirubin      |     | 1   | mg/dL           | > ULN<br>1     | > ULN $\times$ 1.5<br>1.5   | > ULN $\times$ 3<br>3     | > ULN $\times$ 10<br>10     | mg/dL           |
| Serum Creatinine     |     | 1.3 | mg/dL           | > ULN<br>1.3   | > ULN $\times$ 1.5<br>1.95  | > ULN $\times$ 3<br>3.9   | > ULN $\times$ 6<br>7.8     | mg/dL           |
| LDH                  |     | 225 | U/L             | > ULN          |                             |                           |                             | U/L             |

**Abnormal laboratory grading scheme according to CTCAE 4.03 and CTCAE 5.0 (for LDH).** Reference values and the resulting CTCAE-based cut-offs for grading abnormal laboratory values. Red values are based on ULN/LLN and therefore depend on the selected reference ranges. Source for reference values: <https://www.abim.org/~media/ABIM%20Public/Files/pdf/exam/laboratory-reference-ranges.pdf>.

**Supplementary Table S2. Association of patient and treatment-related factors and AEs.** Data is presented as counts and percentages. Significant differences between categorical data were assessed using Chi-squared test to compare patients with  $\geq 1$  AEs and patients with 0 AEs ( $p$  values  $\leq 0.05$  were considered significant).

|                                                                               | Peri-interven-<br>tional AEs (Day<br>1)<br>N = 152 Patients |         | Acute AEs<br>(Day 2 – Day 30)<br>N = 152 Patients |         |
|-------------------------------------------------------------------------------|-------------------------------------------------------------|---------|---------------------------------------------------|---------|
|                                                                               | 0 AEs                                                       | ≥1 AEs  | 0 AEs                                             | ≥1 AEs  |
| Treatment intention, n (%)                                                    |                                                             |         |                                                   |         |
| First line treatment or consolidation therapy after<br>response to first line | 16 (39)                                                     | 25 (61) | 27 (66)                                           | 14 (34) |
| Combination treatment with ablation with a cura-<br>tive intent               | 9 (47)                                                      | 10 (53) | 14 (74)                                           | 5 (26)  |
| Intensification of treatment with/without concomi-<br>tant therapy            | 10 (24)                                                     | 31 (76) | 29 (71)                                           | 12 (29) |
| Salvage treatment in progressive patients                                     | 24 (52)                                                     | 22 (48) | 31 (67)                                           | 15 (33) |
| Other                                                                         | 2 (40)                                                      | 3 (60)  | 2 (40)                                            | 3 (60)  |
|                                                                               | <i>p</i> -value: 0.1                                        |         | <i>p</i> -value: 0.68                             |         |
| Performance status (ECOG) n (%)                                               |                                                             |         |                                                   |         |
| 0                                                                             | 42 (47)                                                     | 47 (53) | 73 (82)                                           | 16 (18) |
| 1                                                                             | 15 (29)                                                     | 37 (71) | 25 (48)                                           | 27 (52) |
| 2                                                                             | 3 (30)                                                      | 7 (70)  | 4 (40)                                            | 6 (60)  |
| 3                                                                             | 1 (100)                                                     | 0 (0)   | 1 (100)                                           | 0 (0)   |
|                                                                               | <i>p</i> -value                                             | 0.09    | <i>p</i> -value                                   | <0.001  |
| % of liver involvement, n (%)                                                 |                                                             |         |                                                   |         |
| < 25%                                                                         | 44 (54)                                                     | 38 (46) | 57 (70)                                           | 25 (30) |
| 25 – 50%                                                                      | 14 (24)                                                     | 45 (76) | 36 (61)                                           | 23 (39) |
| > 50%                                                                         | 3 (27)                                                      | 8 (73)  | 10 (91)                                           | 1 (9)   |
|                                                                               | <i>p</i> -value                                             | 0.001   | <i>p</i> value                                    | 0.13    |
| Extrahepatic metastases, n (%)                                                |                                                             |         |                                                   |         |
| No                                                                            | 39 (45)                                                     | 47 (55) | 62 (72)                                           | 24 (28) |
| Yes                                                                           | 22 (33)                                                     | 44 (67) | 41 (62)                                           | 25 (38) |
|                                                                               | <i>p</i> -value                                             | 0.18    | <i>p</i> -value                                   | 0.26    |
| Previous lines of liver metastases directed systemic<br>therapy, n (%)        |                                                             |         |                                                   |         |
| no lines                                                                      | 11 (46)                                                     | 13 (54) | 18 (75)                                           | 6 (25)  |
| 1-2 lines                                                                     | 41 (37)                                                     | 70 (63) | 79 (71)                                           | 32 (29) |
| 3 or more lines                                                               | 8 (50)                                                      | 8 (50)  | 7 (44)                                            | 9 (56)  |
|                                                                               | <i>p</i> -value                                             | 0.49    | <i>p</i> -value                                   | 0.07    |
| Previous use of irinotecan, n (%)                                             |                                                             |         |                                                   |         |
| No                                                                            | 23 (37)                                                     | 39 (63) | 41 (66)                                           | 21 (34) |
| Yes                                                                           | 38 (43)                                                     | 51 (61) | 61 (69)                                           | 28 (32) |
|                                                                               | <i>p</i> -value                                             | 0.56    | <i>p</i> -value                                   | 0.34    |
| Previous intra-arterial treatment received, n (%)                             |                                                             |         |                                                   |         |
| No                                                                            | 55 (41)                                                     | 80 (59) | 93 (69)                                           | 42 (31) |
| Yes                                                                           | 6 (35)                                                      | 11 (65) | 10 (59)                                           | 7 (41)  |
|                                                                               | <i>p</i> -value                                             | 0.86    | <i>p</i> -value                                   | 0.57    |
| Previous ablation on liver metastases performed, n<br>(%)                     |                                                             |         |                                                   |         |
| No                                                                            | 53 (39)                                                     | 82 (61) | 91 (67)                                           | 44 (33) |
| Yes                                                                           | 8 (47)                                                      | 9 (53)  | 12 (71)                                           | 5 (29)  |

|                                                   | <i>p</i> -value                                          | 0.72     | <i>p</i> -value                                   | 1       |
|---------------------------------------------------|----------------------------------------------------------|----------|---------------------------------------------------|---------|
| Number of treatments received per patient, n (%)  |                                                          |          |                                                   |         |
| 1                                                 | 13 (31)                                                  | 29 (69)  | 26 (62)                                           | 16 (38) |
| 2                                                 | 29 (49)                                                  | 30 (51)  | 45 (76)                                           | 14 (24) |
| 3                                                 | 6 (43)                                                   | 8 (57)   | 9 (64)                                            | 5 (36)  |
| 4                                                 | 13 (35)                                                  | 24 (65)  | 23 (62)                                           | 14 (38) |
|                                                   | <i>p</i> -value                                          | 0.27     | <i>p</i> -value                                   | 0.36    |
| Which lobes were treated per patient, n (%)       |                                                          |          |                                                   |         |
| right                                             | 33 (44)                                                  | 42 (56)  | 54 (72)                                           | 21 (28) |
| left                                              | 10 (71)                                                  | 4 (29)   | 12 (86)                                           | 2 (14)  |
| both                                              | 18 (29)                                                  | 45 (71)  | 37 (59)                                           | 26 (41) |
|                                                   |                                                          | 0.01     |                                                   | 0.02    |
|                                                   | Peri-interven-<br>tional AEs (Day 1)<br>n = 351 sessions |          | Acute AEs<br>(Day 2 - Day 30)<br>n = 351 sessions |         |
|                                                   | 0 AEs                                                    | ≥1 AEs   | 0 AEs                                             | ≥1 AEs  |
| Lobe treated per session, n (%)                   |                                                          |          |                                                   |         |
| Right lobe                                        | 133 (56)                                                 | 106 (44) | 196 (82)                                          | 43 (18) |
| Left lobe                                         | 70 (63)                                                  | 42 (37)  | 90 (80)                                           | 22 (20) |
|                                                   | <i>p</i> -value                                          | 0.32     | <i>p</i> -value                                   | 0.78    |
| Treatment session number, n (%)                   |                                                          |          |                                                   |         |
| 1                                                 | 72 (47)                                                  | 80 (53)  | 121 (80)                                          | 31 (20) |
| 2                                                 | 70 (64)                                                  | 40 (36)  | 93 (85)                                           | 17 (15) |
| 3                                                 | 34 (66)                                                  | 17 (33)  | 41 (80)                                           | 10 (20) |
| 4                                                 | 26 (70)                                                  | 11 (30)  | 30 (81)                                           | 7 (19)  |
| 5                                                 | 1 (100)                                                  | 0 (0)    | 1 (100)                                           | 0 (0)   |
|                                                   | <i>p</i> -value                                          | 0.01     | <i>p</i> -value                                   | 0.86    |
| Dose injected (categorized, 3 doses > 150), n (%) |                                                          |          |                                                   |         |
| ≤50 mg                                            | 26 (59)                                                  | 18 (41)  | 30 (68)                                           | 14 (32) |
| ≤100 mg                                           | 133 (54)                                                 | 113 (46) | 198 (80)                                          | 48 (20) |
| >100 mg                                           | 44 (72)                                                  | 17 (28)  | 58 (95)                                           | 3 (5)   |
|                                                   | <i>p</i> -value                                          | 0.04     | <i>p</i> -value                                   | 0.002   |
| Bead Size per session, n (%)                      |                                                          |          |                                                   |         |
| 100 μm                                            | 172 (64)                                                 | 98 (36)  | 221 (82)                                          | 49 (18) |
| 200 μm                                            | 31 (39)                                                  | 49 (61)  | 64 (80)                                           | 16 (20) |
| 400 μm                                            | 0 (0)                                                    | 1 (100)  | 0 (0)                                             | 1 (100) |
|                                                   | <i>p</i> -value                                          | <0.001   | <i>p</i> -value                                   | 0.79    |
| Treatment technically successful, n (%)           |                                                          |          |                                                   |         |
| No                                                | 199 (58)                                                 | 147 (42) | 281 (81)                                          | 65 (19) |
| Yes                                               | 4 (80)                                                   | 1 (20)   | 5 (100)                                           | 0 (0)   |
|                                                   | <i>p</i> -value                                          | 0.31     | <i>p</i> -value                                   | 0.28    |

Supplementary Table S3.

| Procedural Medication<br>Group as Defined in Figure<br>3 | 1       | 2       | 3      | 4       | 5       | 6       | <i>p</i> Value |
|----------------------------------------------------------|---------|---------|--------|---------|---------|---------|----------------|
| Bead Size per session, n (%)                             |         |         |        |         |         |         |                |
| 100                                                      | 77 (62) | 75 (88) | 9 (60) | 27 (82) | 53 (96) | 29 (76) |                |
| 200*                                                     | 48 (38) | 10 (12) | 6 (40) | 6 (18)  | 2 (4)   | 8 (21)  | <0.001         |
| 400                                                      | 0       | 0       | 0      | 0       | 0       | 1 (3)   |                |
| Dose injected (categorized, 3 doses > 150), n (%)        |         |         |        |         |         |         |                |
| ≤50*                                                     | 3 (2)   | 4 (5)   | 0      | 3 (9)   | 25 (45) | 9 (24)  | <0.001         |

|                                               |                |                |                |                |         |         |        |
|-----------------------------------------------|----------------|----------------|----------------|----------------|---------|---------|--------|
| <=100*                                        | 64 (51)        | <u>81 (95)</u> | <u>14 (93)</u> | <u>28 (85)</u> | 30 (55) | 29 (76) |        |
| >100                                          | 58 (46)        | 0              | 1 (7)          | 2 (6)          | 0       | 0       |        |
| <b>Percentage of liver involvement, n (%)</b> |                |                |                |                |         |         |        |
| < 25%                                         | 54 (43)        | 42 (49)        | 5 (33)         | 21 (64)        | 40 (73) | 26 (68) |        |
| 25 – 50%*                                     | 45 (36)        | 40 (47)        | <u>10 (67)</u> | 11 (33)        | 12 (22) | 11 (29) | <0.001 |
| > 50%*                                        | <u>26 (21)</u> | 3 (4)          | 0 (0)          | 1 (3)          | 3 (5)   | 1 (3)   |        |

\* Were found to be associated with patients who had at least 1 AE in our cohort.
